# Supplementary material for: Phylogeny of Shrew- and Mole-Borne Hantaviruses in Poland and Ukraine
Source: MDPI journal article supplement (doi:10.3390/v15040881), 2023-03-29
Supplement: s1 [file s1]

Supplemental Table S1. Pairwise Comparison of L-Segment Nucleotide Sequences of SWSV Strains

|                                       |                                      | Amino Acid Sequence Similarity |                               |                               |                               |                               |                               |                                 |                                 |                                 |                                      |                                     |                                    |                                    |                                    |                                    |                                    |                                      |                                         |                                       |                                        |                                          |                                   |                                        |
|---------------------------------------|--------------------------------------|--------------------------------|-------------------------------|-------------------------------|-------------------------------|-------------------------------|-------------------------------|---------------------------------|---------------------------------|---------------------------------|--------------------------------------|-------------------------------------|------------------------------------|------------------------------------|------------------------------------|------------------------------------|------------------------------------|--------------------------------------|-----------------------------------------|---------------------------------------|----------------------------------------|------------------------------------------|-----------------------------------|----------------------------------------|
|                                       |                                      | SWS<br>1107<br>2010<br>Poland  | SWS<br>2059<br>2011<br>Poland | SWS<br>2063<br>2011<br>Poland | SWS<br>2049<br>2011<br>Poland | SWS<br>3334<br>2013<br>Poland | SWS<br>3343<br>2013<br>Poland | SWS<br>Sa10-1<br>2010<br>Poland | SWS<br>Sa10-5<br>2010<br>Poland | SWS<br>Sa10-6<br>2010<br>Poland | SWS<br>PL7663JH151<br>2017<br>Poland | SWSV<br>mp70<br>2006<br>Switzerland | SWS<br>MSB94609<br>2000<br>Hungary | SWS<br>MSB95463<br>1997<br>Hungary | SWS<br>DGR18874<br>1982<br>Finland | SWS<br>DGR18207<br>1982<br>Finland | SWS<br>Beskydy415<br>2010<br>Czech | SWS<br>Kosice260<br>2008<br>Slovakia | SWS<br>Koednitz08068<br>2007<br>Germany | SWS<br>Horst092292<br>2009<br>Germany | SWS<br>Goriska6193<br>2013<br>Slovenia | SWS<br>NotrKras36290<br>2013<br>Slovenia | SWS<br>Telet300<br>2007<br>Russia | SWS<br>ParnayaSa1197<br>2008<br>Russia |
|                                       |                                      |                                |                               |                               |                               |                               |                               |                                 |                                 |                                 |                                      |                                     |                                    |                                    |                                    |                                    |                                    |                                      |                                         |                                       |                                        |                                          |                                   |                                        |
| SWS 1107<br>2010 Poland               |                                      | 0.9846                         | 0.9576                        | 1                             | 1                             | 0.9652                        | 1                             | 1                               | 1                               | 1                               | 0.9925                               | 0.9813                              | 1                                  | 0.9851                             | 0.9779                             | 0.9909                             | 0.9727                             | 0.9703                               | 0.9636                                  | 0.9789                                | 0.9583                                 | 0.9652                                   | 0.9652                            |                                        |
|                                       | SWS 2059<br>2011 Poland              | 0.8107                         |                               | 0.9831                        | 0.9661                        | 1                             | 1                             | 0.9844                          | 0.9844                          | 0.9652                          | 0.9923                               | 0.9808                              | 1                                  | 0.9851                             | 0.9779                             | 0.9727                             | 0.9727                             | 0.9703                               | 0.9818                                  | 0.9789                                | 0.9792                                 | 1                                        | 1                                 |                                        |
|                                       | SWS 2063<br>2011 Poland              | 0.8006                         | 0.9803                        |                               | 0.9576                        | ND                            | 0.9826                        | 0.9565                          | 0.9565                          | 0.9565                          | 0.9746                               | 0.9492                              | ND                                 | ND                                 | ND                                 | 0.9537                             | 0.9537                             | 0.9505                               | 0.9630                                  | 0.9579                                | 0.9583                                 | 0.9826                                   | 0.9826                            |                                        |
|                                       | SWS 2049<br>2011 Poland              | 0.8596                         | 0.7978                        | 0.7949                        |                               | ND                            | 0.9652                        | 1                               | 1                               | 1                               | 1                                    | 0.9831                              | 0.9661                             | ND                                 | ND                                 | ND                                 | 0.9907                             | 0.9722                               | 0.9703                                  | 0.9630                                | 0.9789                                 | 0.9583                                   | 0.9652                            | 0.9652                                 |
|                                       | SWS 3334<br>2013 Poland              | 0.9898                         | 0.8041                        | ND                            | ND                            |                               | ND                            | 1                               | 1                               | 1                               | ND                                   | 1                                   | 0.9924                             | 1                                  | 0.9847                             | 0.9771                             | ND                                 | ND                                   | ND                                      | ND                                    | ND                                     | ND                                       | ND                                | ND                                     |
|                                       | SWS 3343<br>2013 Poland              | 0.8266                         | 0.8584                        | 0.8555                        | 0.8092                        | ND                            |                               | 0.9652                          | 0.9652                          | 0.9652                          | 0.9652                               | 0.9826                              | 0.9652                             | ND                                 | ND                                 | ND                                 | 0.9722                             | 0.9722                               | 0.9703                                  | 0.9815                                | 0.9789                                 | 0.9792                                   | 1                                 | 1                                      |
|                                       | SWS Sa10-1<br>2010 Poland            | 0.8903                         | 0.8148                        | 0.7948                        | 0.8584                        | 0.8906                        | 0.815                         |                                 | 0.9972                          | 0.9910                          | 1                                    | 0.9889                              | 0.9698                             | 1                                  | 0.9851                             | 0.9779                             | 0.9909                             | 0.9727                               | 0.9703                                  | 0.9636                                | 0.9789                                 | 0.9583                                   | 0.9652                            | 0.9652                                 |
|                                       | SWS Sa10-5<br>2010 Poland            | 0.8903                         | 0.8148                        | 0.7948                        | 0.8584                        | 0.8906                        | 0.815                         | 0.9972                          |                                 | 0.9910                          | 1                                    | 0.9889                              | 0.9698                             | 1                                  | 0.9851                             | 0.9779                             | 0.9909                             | 0.9727                               | 0.9703                                  | 0.9636                                | 0.9789                                 | 0.9583                                   | 0.9652                            | 0.9652                                 |
|                                       | SWS Sa10-6<br>2010 Poland            | 0.8903                         | 0.8148                        | 0.7948                        | 0.8584                        | 0.8906                        | 0.815                         | 0.9960                          | 0.996                           |                                 | 1                                    | 0.9820                              | 0.9698                             | 1                                  | 0.9851                             | 0.9779                             | 0.9909                             | 0.9727                               | 0.9703                                  | 0.9636                                | 0.9789                                 | 0.9583                                   | 0.9652                            | 0.9652                                 |
|                                       | SWS<br>PL7663JH151<br>2017 Poland    | 0.9885                         | 0.7954                        | 0.7948                        | 0.8584                        | ND                            | 0.8237                        | 0.8818                          | 0.8818                          | 0.8818                          |                                      | 0.9826                              | 0.9652                             | ND                                 | ND                                 | ND                                 | 0.9907                             | 0.9722                               | 0.9703                                  | 0.963                                 | 0.9789                                 | 0.9583                                   | 0.9652                            | 0.9652                                 |
| Nucleotide<br>Sequence<br>Similarity  | SWSV mp70<br>2006 Switzerland        | 0.8208                         | 0.8414                        | 0.8399                        | 0.7978                        | 0.8168                        | 0.8150                        | 0.8278                          | 0.8292                          | 0.8277                          | 0.8040                               |                                     | 0.9704                             | 1                                  | 0.9851                             | 0.9779                             | 0.9727                             | 0.9727                               | 0.9703                                  | 0.9818                                | 0.9789                                 | 0.9583                                   | 0.9826                            | 0.9826                                 |
|                                       | SWS MSB94609<br>2000 Hungary         | 0.8337                         | 0.8159                        | 0.8062                        | 0.8090                        | 0.8346                        | 0.8266                        | 0.8105                          | 0.8105                          | 0.8105                          | 0.8329                               | 0.8101                              |                                    | 0.9932                             | 0.9776                             | 0.9853                             | 0.9727                             | 0.9727                               | 0.9703                                  | 0.9636                                | 0.9789                                 | 0.9792                                   | 0.9652                            | 0.9652                                 |
|                                       | SWS MSB95463<br>1997 Hungary         | 0.8219                         | 0.8263                        | ND                            | ND                            | 0.8092                        | ND                            | 0.8091                          | 0.8091                          | 0.8091                          | ND                                   | 0.7932                              | 0.8250                             |                                    | 0.9851                             | 0.9779                             | ND                                 | ND                                   | ND                                      | ND                                    | ND                                     | ND                                       | ND                                | ND                                     |
|                                       | SWS<br>DGR18874<br>1982 Finland      | 0.7970                         | 0.8114                        | ND                            | ND                            | 0.7939                        | ND                            | 0.8144                          | 0.8144                          | 0.8144                          | ND                                   | 0.7921                              | 0.8020                             | 0.7748                             |                                    | 0.9627                             | ND                                 | ND                                   | ND                                      | ND                                    | ND                                     | ND                                       | ND                                | ND                                     |
|                                       | SWS<br>DGR18207<br>1982 Finland      | 0.7995                         | 0.8088                        | ND                            | ND                            | 0.7939                        | ND                            | 0.8093                          | 0.8093                          | 0.8093                          | ND                                   | 0.8020                              | 0.8068                             | 0.7971                             | 0.7896                             |                                    | ND                                 | ND                                   | ND                                      | ND                                    | ND                                     | ND                                       | ND                                | ND                                     |
|                                       | SWS<br>Beskydy415<br>2010 Czech      | 0.8333                         | 0.8333                        | 0.8241                        | 0.8241                        | ND                            | 0.8364                        | 0.8333                          | 0.8333                          | 0.8333                          | 0.8277                               | 0.8212                              | 0.8485                             | ND                                 | ND                                 | ND                                 |                                    | 0.9818                               | 0.9802                                  | 0.9727                                | 0.9895                                 | 0.9687                                   | 0.9722                            | 0.9722                                 |
|                                       | SWS Kosice260<br>2008 Slovakia       | 0.8242                         | 0.8242                        | 0.8241                        | 0.7994                        | ND                            | 0.8364                        | 0.8152                          | 0.8152                          | 0.8152                          | 0.8154                               | 0.8030                              | 0.8424                             | ND                                 | ND                                 | ND                                 | 0.8242                             |                                      | 0.9901                                  | 0.9727                                | 1                                      | 0.9792                                   | 0.9722                            | 0.9722                                 |
|                                       | SWS<br>Koednitz08068<br>2007 Germany | 0.8284                         | 0.8053                        | 0.7987                        | 0.8119                        | ND                            | 0.8317                        | 0.8218                          | 0.8218                          | 0.8218                          | 0.8251                               | 0.7954                              | 0.8053                             | ND                                 | ND                                 | ND                                 | 0.8020                             | 0.8350                               |                                         | 0.9703                                | 0.9895                                 | 0.9687                                   | 0.9703                            | 0.9703                                 |
|                                       | SWS<br>Horst092292<br>2009 Germany   | 0.8121                         | 0.7970                        | 0.7963                        | 0.7685                        | ND                            | 0.8210                        | 0.7909                          | 0.7909                          | 0.7909                          | 0.8062                               | 0.8091                              | 0.8394                             | ND                                 | ND                                 | ND                                 | 0.8061                             | 0.8333                               | 0.8251                                  |                                       | 0.9789                                 | 0.9583                                   | 0.9815                            | 0.9815                                 |
|                                       | SWS<br>Goriska6193<br>2013 Slovenia  | 0.8014                         | 0.8049                        | 0.7979                        | 0.8153                        | ND                            | 0.8118                        | 0.8258                          | 0.8258                          | 0.8258                          | 0.7875                               | 0.8049                              | 0.8676                             | ND                                 | ND                                 | ND                                 | 0.8328                             | 0.8188                               | 0.8084                                  | 0.8153                                |                                        | 0.9789                                   | 0.9789                            | 0.9789                                 |
| SWS<br>NotrKras36290<br>2013 Slovenia | 0.8125                               | 0.7951                         | 0.7951                        | 0.8368                        | ND                            | 0.8160                        | 0.8299                        | 0.8299                          | 0.8299                          | 0.8125                          | 0.8160                               | 0.8681                              | ND                                 | ND                                 | ND                                 | 0.8507                             | 0.8299                             | 0.8299                               | 0.8056                                  | 0.8606                                |                                        | 0.9792                                   | 0.9792                            |                                        |
| SWS Telet-300<br>2007 Russia          | 0.8213                               | 0.8213                         | 0.8208                        | 0.7890                        | ND                            | 0.8179                        | 0.8156                        | 0.8156                          | 0.8156                          | 0.8184                          | 0.7983                               | 0.7810                              | ND                                 | ND                                 | ND                                 | 0.7785                             | 0.7754                             | 0.7987                               | 0.8031                                  | 0.8188                                | 0.8125                                 |                                          | 1                                 |                                        |
| SWS<br>ParnayaSa1197<br>2008 Russia   | 0.8271                               | 0.8386                         | 0.8353                        | 0.8121                        | ND                            | 0.8092                        | 0.8098                        | 0.8098                          | 0.8098                          | 0.8242                          | 0.8213                               | 0.7925                              | ND                                 | ND                                 | ND                                 | 0.8123                             | 0.8000                             | 0.8185                               | 0.7969                                  | 0.8014                                | 0.8264                                 | 0.9164                                   |                                   |                                        |

ID: not detected (sequence homologies of 10 nt or less were excluded from the analysis).

Supplemental Table S1. Pairwise Comparison of L-Segment Nucleotide Sequences of NVAV Strains

| Amino Acid Sequence Similarity     |                                     |                                  |                                  |                                      |                                        |                                |                                |                                |                                |                                |                                       |                                       |                                       |                                       |                                       |                                       |                                       |                                       |                                          |                                          |  |
|------------------------------------|-------------------------------------|----------------------------------|----------------------------------|--------------------------------------|----------------------------------------|--------------------------------|--------------------------------|--------------------------------|--------------------------------|--------------------------------|---------------------------------------|---------------------------------------|---------------------------------------|---------------------------------------|---------------------------------------|---------------------------------------|---------------------------------------|---------------------------------------|------------------------------------------|------------------------------------------|--|
|                                    | NVAV<br>MSB95703<br>1999<br>Hungary | NVAV<br>YA0067<br>2013<br>France | NVAV<br>YA0088<br>2013<br>France | NVAV<br>BENamurTE<br>2013<br>Belgium | NVAV<br>BEGenappeTE<br>2013<br>Belgium | NVAV<br>1129<br>2010<br>Poland | NVAV<br>2086<br>2011<br>Poland | NVAV<br>2105<br>2011<br>Poland | NVAV<br>3328<br>2013<br>Poland | NVAV<br>Te34<br>2013<br>Poland | NVAV<br>PL7690JH204<br>2017<br>Poland | NVAV<br>PL7691JH205<br>2017<br>Poland | NVAV<br>PL7698JH212<br>2017<br>Poland | NVAV<br>PL7706JH220<br>2015<br>Poland | NVAV<br>PL7710JH224<br>2017<br>Poland | NVAV<br>PL7712JH226<br>2012<br>Poland | NVAV<br>PL7713JH227<br>2012<br>Poland | NVAV<br>PL7714JH228<br>2012<br>Poland | NVAV<br>PL7965LW001TA<br>2016<br>Ukraine | NVAV<br>PL7970LW006TA<br>2016<br>Ukraine |  |
| NVAV MSB95703<br>1999 Hungary      |                                     | 0.9737                           | 0.9774                           | 0.9708                               | 0.9708                                 | 0.9854                         | 0.9847                         | 0.9883                         | 0.9744                         | 0.9638                         | 0.9658                                | 0.9658                                | 0.9655                                | 0.9658                                | 0.9658                                | 0.9744                                | 0.9573                                | 0.9573                                | 0.9720                                   | 0.9744                                   |  |
| NVAV YA0067<br>2013 France         | 0.8365                              |                                  | 0.9737                           | 0.9624                               | 0.9737                                 | 0.9699                         | 0.9695                         | 0.9699                         | 0.9658                         | 0.9699                         | 0.9573                                | 0.9573                                | 0.9569                                | 0.9573                                | 0.9573                                | 0.9658                                | 0.9487                                | 0.9487                                | 0.9720                                   | 0.9744                                   |  |
| NVAV YA0088<br>2013 France         | 0.8577                              | 0.8477                           |                                  | 0.9812                               | 0.9774                                 | 0.9737                         | 0.9733                         | 0.9737                         | 0.9658                         | 0.9737                         | 0.9573                                | 0.9573                                | 0.9569                                | 0.9573                                | 0.9573                                | 0.9658                                | 0.9487                                | 0.9487                                | 0.9533                                   | 0.9573                                   |  |
| NVAV BENamurTE<br>2013 Belgium     | 0.8548                              | 0.8215                           | 0.8639                           |                                      | 0.9801                                 | 0.9737                         | 0.9733                         | 0.9766                         | 0.9658                         | 0.9634                         | 0.9573                                | 0.9573                                | 0.9569                                | 0.9573                                | 0.9573                                | 0.9658                                | 0.9487                                | 0.9487                                | 0.9626                                   | 0.9658                                   |  |
| NVAV BEGenappeTE<br>2013 Belgium   | 0.8565                              | 0.8365                           | 0.8290                           | 0.8778                               |                                        | 0.9795                         | 0.9809                         | 0.9825                         | 0.9829                         | 0.9606                         | 0.9744                                | 0.9744                                | 0.9741                                | 0.9744                                | 0.9744                                | 0.9829                                | 0.9658                                | 0.9658                                | 0.9720                                   | 0.9744                                   |  |
| NVAV 1129<br>2010 Poland           | 0.8635                              | 0.8325                           | 0.8487                           | 0.8694                               | 0.8694                                 |                                | 1                              | 0.9971                         | 1                              | 0.9971                         | 0.9915                                | 0.9915                                | 0.9914                                | 0.9915                                | 0.9915                                | 1                                     | 0.9829                                | 0.9829                                | 0.9626                                   | 0.9658                                   |  |
| NVAV 2086<br>2011 Poland           | 0.8668                              | 0.8338                           | 0.8541                           | 0.8655                               | 0.8503                                 | 0.9645                         |                                | 1                              | 1                              | 1                              | 0.9915                                | 0.9915                                | 0.9914                                | 0.9915                                | 0.9915                                | 1                                     | 0.9829                                | 0.9829                                | 0.9626                                   | 0.9658                                   |  |
| NVAV 2105<br>2011 Poland           | 0.8713                              | 0.8312                           | 0.8475                           | 0.8674                               | 0.8674                                 | 0.9688                         | 0.9848                         |                                | 1                              | 1                              | 0.9915                                | 0.9915                                | 0.9914                                | 0.9915                                | 0.9915                                | 1                                     | 0.9829                                | 0.9829                                | 0.9626                                   | 0.9658                                   |  |
| NVAV 3328<br>2013 Poland           | 0.8437                              | 0.8551                           | 0.8551                           | 0.8494                               | 0.8523                                 | 0.9972                         | 0.9659                         | 0.9801                         |                                | 1                              | 0.9915                                | 0.9915                                | 0.9914                                | 0.9915                                | 0.9915                                | 1                                     | 0.9829                                | 0.9829                                | 0.9626                                   | 0.9658                                   |  |
| NVAV Te34<br>2013 Poland           | 0.8539                              | 0.8365                           | 0.8464                           | 0.8602                               | 0.8556                                 | 0.9708                         | 0.9632                         | 0.9669                         | 0.9716                         |                                | 0.9915                                | 0.9915                                | 0.9914                                | 0.9915                                | 0.9915                                | 1                                     | 0.9829                                | 0.9829                                | 0.9626                                   | 0.9658                                   |  |
| NVAV PL7690JH204<br>2017 Poland    | 0.8470                              | 0.8555                           | 0.8555                           | 0.8470                               | 0.8470                                 | 0.9632                         | 0.9660                         | 0.9575                         | 0.9602                         | 0.9603                         |                                       | 1                                     | 1                                     | 1                                     | 1                                     | 0.9915                                | 0.9915                                | 0.9915                                | 0.9626                                   | 0.9573                                   |  |
| NVAV PL7691JH205<br>2017 Poland    | 0.8442                              | 0.8527                           | 0.8584                           | 0.8499                               | 0.8442                                 | 0.9603                         | 0.9575                         | 0.9547                         | 0.9574                         | 0.9575                         | 0.9915                                |                                       | 1                                     | 1                                     | 1                                     | 0.9915                                | 0.9915                                | 0.9915                                | 0.9626                                   | 0.9573                                   |  |
| NVAV PL7698JH212<br>2017 Poland    | 0.8442                              | 0.8584                           | 0.8527                           | 0.8499                               | 0.8499                                 | 0.9660                         | 0.9632                         | 0.9603                         | 0.9631                         | 0.9632                         | 0.9972                                | 0.9943                                |                                       | 1                                     | 1                                     | 0.9914                                | 0.9914                                | 0.9914                                | 0.9626                                   | 0.9569                                   |  |
| NVAV PL7706JH220<br>2015 Poland    | 0.8470                              | 0.8555                           | 0.8555                           | 0.8470                               | 0.8470                                 | 0.9632                         | 0.9660                         | 0.9575                         | 0.9602                         | 0.9603                         | 1                                     | 0.9915                                | 0.9972                                |                                       | 1                                     | 0.9915                                | 0.9915                                | 0.9915                                | 0.9626                                   | 0.9573                                   |  |
| NVAV PL7710JH224<br>2017 Poland    | 0.8470                              | 0.8555                           | 0.8555                           | 0.8470                               | 0.8470                                 | 0.9632                         | 0.9660                         | 0.9575                         | 0.9602                         | 0.9603                         | 1                                     | 0.9915                                | 0.9972                                | 1                                     |                                       | 0.9915                                | 0.9915                                | 0.9915                                | 0.9626                                   | 0.9573                                   |  |
| NVAV PL7712JH226<br>2012 Poland    | 0.8442                              | 0.8555                           | 0.8499                           | 0.8499                               | 0.8527                                 | 1                              | 0.9688                         | 0.9830                         | 0.9972                         | 0.9688                         | 0.9632                                | 0.9603                                | 0.9660                                | 0.9632                                | 0.9632                                |                                       | 0.9829                                | 0.9829                                | 0.9626                                   | 0.9658                                   |  |
| NVAV PL7713JH227<br>2012 Poland    | 0.8414                              | 0.8555                           | 0.8442                           | 0.8470                               | 0.8442                                 | 0.9632                         | 0.9603                         | 0.9575                         | 0.9602                         | 0.9547                         | 0.9887                                | 0.9858                                | 0.9915                                | 0.9887                                | 0.9887                                | 0.9632                                |                                       | 0.9829                                | 0.9626                                   | 0.9573                                   |  |
| NVAV PL7714JH228<br>2012 Poland    | 0.8414                              | 0.8555                           | 0.8442                           | 0.8470                               | 0.8442                                 | 0.9632                         | 0.9603                         | 0.9575                         | 0.9602                         | 0.9547                         | 0.9887                                | 0.9858                                | 0.9915                                | 0.9887                                | 0.9887                                | 0.9632                                | 0.9943                                |                                       | 0.9533                                   | 0.9487                                   |  |
| NVAV PL7965LW001TA<br>2016 Ukraine | 0.8395                              | 0.8549                           | 0.8395                           | 0.8179                               | 0.8179                                 | 0.8426                         | 0.8519                         | 0.8488                         | 0.8457                         | 0.8488                         | 0.8580                                | 0.8488                                | 0.8549                                | 0.8580                                | 0.8580                                | 0.8426                                | 0.8488                                | 0.8488                                |                                          | 1                                        |  |
| NVAV PL7970LW006TA<br>2016 Ukraine | 0.8442                              | 0.8555                           | 0.8414                           | 0.8300                               | 0.8300                                 | 0.8555                         | 0.8640                         | 0.8555                         | 0.8580                         | 0.8669                         | 0.8669                                | 0.8584                                | 0.8640                                | 0.8669                                | 0.8669                                | 0.8555                                | 0.8584                                | 0.8584                                | 0.9815                                   |                                          |  |
