# Supplementary material for: Phylogeny of Shrew- and Mole-Borne Hantaviruses in Poland and Ukraine
Source: MDPI journal article supplement (doi:10.3390/v15040881), 2023-03-29
Supplement: s1 [file s1]

**Supplemental Table S2. GenBank Accession Numbers of Taxa for S and L trees**

| <b>Virus</b> | <b>Strain</b>              | <b>Year</b> | <b>Capture Site</b> | <b>Country</b> | <b>S</b> | <b>L</b> |
|--------------|----------------------------|-------------|---------------------|----------------|----------|----------|
| SWSV         | 1107                       | 2010        | Boginia             | Poland         | JX990921 | JX990936 |
| SWSV         | 2059                       | 2011        | Chmiel              | Poland         | KM394269 | JX990941 |
| SWSV         | 2063                       | 2011        | Chmiel              | Poland         | KM394270 | JX990942 |
| SWSV         | 2049                       | 2011        | Huta Dłutowska      | Poland         | KM394271 | JX990945 |
| SWSV         | 3334                       | 2013        | Kurowice            | Poland         | KM434198 | KM394263 |
| SWSV         | 3343                       | 2013        | Kurowice            | Poland         | KM434199 | KM394265 |
| SWSV         | Sa10-1                     | 2010        | Osobowice           | Poland         | MK402016 | MK402015 |
| SWSV         | Sa10-5                     | 2010        | Osobowice           | Poland         | MK402019 | MK402017 |
| SWSV         | Sa10-6                     | 2010        | Osobowice           | Poland         | MK402022 | MK402020 |
| SWSV         | mp70                       | 2006        | Seewis              | Switzerland    | EF636024 | EF636026 |
| SWSV         | MSB94609                   | 2000        | Zala                | Hungary        | GQ293138 | GQ293123 |
| SWSV         | MSB95463                   | 1997        | Gyor-Sopron-Moson   | Hungary        | GQ293136 | GQ293116 |
| SWSV         | DGR18874                   | 1982        | Oulun Lääni         | Finland        | GQ293132 | GQ293111 |
| SWSV         | DGR18207                   | 1982        | Lappi               | Finland        | GQ293126 | GQ293103 |
| SWSV         | Beskydy415                 | 2010        | Beskydy             | Czech Rep      | JQ425306 | JQ425341 |
| SWSV         | Košice260                  | 2008        | Košice              | Slovakia       | JQ425272 | JQ425317 |
| SWSV         | Ködnitz08068               | 2007        | Ködnitz             | Germany        | JQ425260 | JQ425309 |
| SWSV         | Horst092292                | 2009        | Horst               | Germany        | JQ425265 | JQ425311 |
| SWSV         | Goriska_61_9               | 2013        | Goriska             | Slovenia       | KF060930 | KF060925 |
| SWSV         | Notr-Kras_362_90           | 2013        | Notr-Kras           | Slovenia       | KF060931 | KF060924 |
| SWSV         | Telet-Sa300                | 2007        | Teletskoye Lake     | Russia         | MN815797 | EU424334 |
| SWSV         | Parnaya-Sa1197             | 2008        | Parnaya             | Russia         | MG279214 | MG279210 |
|              |                            |             |                     |                |          |          |
| BOGV         | 2074                       | 2011        | Boginia             | Poland         |          | JX990965 |
| BOGV         | 2073                       | 2011        | Huta Dłutowska      | Poland         |          | JX990964 |
| BOGV         | 2177                       | 2012        | Kurowice            | Poland         |          | KC537795 |
| BOGV         | LaihiaL                    | 2005        | Laihia              | Finland        |          | KJ136642 |
|              |                            |             |                     |                |          |          |
| NVAV         | 2086                       | 2011        | Brosinin            | Poland         | KF515970 | JX990963 |
| NVAV         | 1129                       | 2010        | Huta Dłutowska      | Poland         | JX990922 | JX990946 |
| NVAV         | 2105                       | 2011        | Huta Dłutowska      | Poland         | JX990935 | JX990962 |
| NVAV         | 3328                       | 2013        | Huta Dłutowska      | Poland         | KM403429 | KM394244 |
| NVAV         | MSB95703                   | 1999        | Nova                | Hungary        | FJ539168 | FJ593498 |
| NVAV         | YA0067                     | 2013        | Ozair-la-Ferrière   | France         | KF010576 | KF010544 |
| NVAV         | YA0088                     | 2013        | Beauvais            | France         | KF010570 | KF010533 |
| NVAV         | BE/Vieux-Genappe/TE/2013/2 | 2013        | Vieux-Genappe       | Belgium        | KY780086 | KY780088 |
| NVAV         | BE/Namur/TE/2013/1         | 2013        | Namur               | Belgium        | KT004445 | KT004447 |
|              |                            |             |                     |                |          |          |
| BRGV         | DE/Wandlitz/TE/2013/1      | 2013        | Wandlitz            | Germany        | MF683844 | MF683846 |
| BRGV         | BE/Vieux-Genappe/TE/2013/1 | 2013        | Vieux-Genappe       | Belgium        | KX551960 | KX551962 |
|              |                            |             |                     |                |          |          |
| ALTV         | ALT302                     | 2007        | Teletskoye Lake     | Russia         | MK340902 | MT648514 |
| ALTV         | Parabel-Sa44               | 2019        | Parabel             | Russia         | MT560057 | MN815789 |
| ALTV         | MSB95363                   | 1997        | Nógrád              | Hungary        | GQ293127 | GQ293104 |
| ALTV         | Uurainen63L                | 2004        | Uurainen            | Finland        |          | KJ136623 |
| ALTV         | Smin1108                   | 2010        | Chmiel              | Poland         |          | MN244248 |
|              |                            |             |                     |                |          |          |
| LENV         | MSB146482                  | 2010        | Lena River          | Russia         | KM361043 | KM361055 |
| LENV         | Parnaya-Sc1217             | 2008        | Parnaya             | Russia         | MW505551 | MW505552 |
| LENV         | Khekhtsir-Sc67             | 2008        | Khekhtsir           | Russia         | MH499470 | MH499472 |

**GenBank Accession numbers of newfound hantavirus sequences from Poland and Ukraine**

| Hantavirus | Strain        | Year | Capture Site      | Country | S GenBank | nt  | L GenBank | nt  |
|------------|---------------|------|-------------------|---------|-----------|-----|-----------|-----|
| SWSV       | PL7663JH151   | 2017 | Boginia           | Poland  |           |     | OQ341654  | 347 |
| ALTV       | PL7814LR56    | 2004 | Białowieża Forest | Poland  |           |     | OQ341663  | 353 |
| NVAV       | PL7690JH204   | 2017 | Huta Dłutowska    | Poland  |           |     | OQ341655  | 353 |
| NVAV       | PL7691JH205   | 2017 | Huta Dłutowska    | Poland  |           |     | OQ341656  | 353 |
| NVAV       | PL7698JH212   | 2017 | Huta Dłutowska    | Poland  |           |     | OQ341657  | 353 |
| NVAV       | PL7706JH220   | 2015 | Huta Dłutowska    | Poland  |           |     | OQ341658  | 353 |
| NVAV       | PL7710JH224   | 2017 | Huta Dłutowska    | Poland  |           |     | OQ341659  | 353 |
| NVAV       | PL7712JH226   | 2012 | Huta Dłutowska    | Poland  | OQ352297  | 707 | OQ341660  | 353 |
| NVAV       | PL7713JH227   | 2012 | Huta Dłutowska    | Poland  |           |     | OQ341661  | 353 |
| NVAV       | PL7714JH228   | 2012 | Huta Dłutowska    | Poland  |           |     | OQ341662  | 353 |
| NVAV       | PL7965LW001TA | 2016 | Lviv              | Ukraine |           |     | OQ341664  | 324 |
| NVAV       | PL7970LW006TA | 2016 | Lviv              | Ukraine | OQ352298  | 698 | OQ341665  | 353 |

**Representative Hantaviruses Harbored by Rodents, Shrews and Moles**

| Hantavirus | Strain                 | Country        | S         | L         |
|------------|------------------------|----------------|-----------|-----------|
| TPMV       | VRC66412               | India          | AY526097  | EU001330  |
| MJNV       | CI05-11                | Korea          | EF641804  | EF641806  |
| ULUV       | FMNH158302             | Tanzania       | JX193695  | JX193697  |
| KMJV       | FMNH174124             | Tanzania       | JX193698  | JX193700  |
| CBNV       | CBN-3                  | Vietnam        | EF543524  | EF543525  |
| JJUV       | SH42                   | Korea          | HQ663933  | HQ663935  |
| AZGV       | KBM15                  | Côte d'Ivoire  | JF276226  | JF276228  |
| BOWV       | VN1512                 | Guinea         | KC631782  | KC631784  |
| TGNV       | Tan826                 | Guinea         | EF050455  | EF050454  |
| ARRV       | MSB73418               | United States  | EF650086  | EF619961  |
| YKSV       | Si-210                 | China          | JX465423  | JX465389  |
| JMSV       | MSB144475              | United States  | FJ593499  | FJ593501  |
| KKMV       | MSB148794              | Russia         | GQ306148  | GQ306150  |
| ASIV       | CZ/Drahany/420/2010/Sm | Czech Republic | KC880342  | KC880348  |
| ASAV       | N10                    | Japan          | EU929072  | EU929078  |
| OXBV       | Ng1453                 | United States  | FJ5339166 | FJ593497  |
| RKPV       | MSB57412               | United States  | HM015223  | HM015221  |
| TIGV       | ET2121                 | Ethiopia       | KU934010  | KU934008  |
| SNV        | NMH10                  | United States  | NC_005216 | NC_005217 |
| ANDV       | Chile9717869           | Chile          | AF291702  | AF291704  |
| PHV        | PH-1                   | United States  | Z49098    | EF646763  |
| TULV       | M5302v                 | Czech Republic | NC_005227 | NC_005226 |
| PUUV       | Sotkamo                | Finland        | NC_005224 | NC_005225 |
| SANGV      | SA14                   | Guinea         | JQ082300  | JQ082302  |
| SOOV       | SOO-1                  | Korea          | AY675349  | DQ056292  |
| DOBV/BGDV  | Greece                 | Greece         | NC_005233 | NC_005235 |
| HTNV       | 76-118                 | Korea          | NC_005218 | NC_005222 |
| SEOV       | 80-39                  | Korea          | NC_005236 | NC_005238 |
